# Supplementary material for: Differential impacts of Funneliformis mosseae and Rhizophagus intraradice on soil quality and rice yield in paddy fields: mediated by AMF-rice-rhizosphere microbe interactions
Source: Research Square preprint supplement (doi:10.21203/rs.3.rs-6936303/v1), 2025-06-26
Supplement: Supplementary file 1 [file a706e4202040a94c15f8609b.docx]

**Differential impacts of *Funneliformis mosseae* and *Rhizophagus intraradice* on soil quality and rice yield in paddy fields: mediated by AMF-rice-rhizosphere microbe interactions**

Minyong Shi a, Yanling Wu a, Ruotong Wu a, Junjie Liu b, Feng Shi a, Xiaoxu Fan a*, Fuqiang Song a*

*a Engineering Research Center of Agricultural Microbiology Technology, Ministry of Education & Heilongjiang Provincial Key Laboratory of Ecological Restoration and Resource Utilization for Cold Region & Key Laboratory of Microbiology, College of Heilongjiang Province & School of Life Sciences, Heilongjiang University, Harbin 150080, China*

*b Key Laboratory of Mollisols Agroecology, Northeast Institute of Geography and Agroecology, Chinese Academy of Sciences, Harbin 150081, China*

**Table S1 Principal Component Analysis Results - Initial Eigenvalues and Extracted Loadings**

|  |  | Initial Eigenvalues | |  | Extracted Loadings | |
| --- | --- | --- | --- | --- | --- | --- |
| Component | Total | Variance (%) | Cumulative (%) | Total | Variance (%) | Cumulative (%) |
| 1 | 10.241 | 73.149 | 73.149 | 10.241 | 73.149 | 73.149 |
| 2 | 2.559 | 18.277 | 91.426 | 2.559 | 18.227 | 91.426 |
| 3 | 0.613 | 4.378 | 95.803 | - | - | - |
| 4 | 0.306 | 2.186 | 97.99 | - | - | - |
| 5 | 0.156 | 1.113 | 99.103 | - | - | - |
| 6 | 0.060 | 0.43 | 99.532 | - | - | - |
| 7 | 0.042 | 0.299 | 99.831 | - | - | - |
| 8 | 0.024 | 0.169 | 100 | - | - | - |

|  | CK | Fm | Ri |
| --- | --- | --- | --- |
| pH | 7.26±0.43a | 7.13±0.36a | 7.08±0.54a |
| SOM g/kg | 19.33±2.31c | 47.00±5.00a | 37.33±3.06b |
| SOC g/kg | 11.60±2.01c | 27.26±2.90a | 21.65±1.77b |
| TN g/kg | 0.98 ±0.40c | 2.05±0.08b | 1.47±0.02a |
| TP g/kg | 0.69±0.04c | 1.05±0.07b | 0.81±0.03a |
| AP mg/kg | 11.77±1.62c | 20.01±2.54b | 33.64±2.54a |
| AK mg/kg | 61.00±24.56b | 150.67±32.52a | 154.67±22.12a |
| NO3--N g/kg | 9.15±1.68c | 26.92±2.20a | 15.86±2.15b |
| NH4+-N g/kg | 13.15±2.19c | 37.40±1.79a | 21.84±1.08b |
| S-AGL U/g | 16.21±0.98b | 24.73±3.20a | 20.67±1.19a |
| S-NAG nmol·(g·h)⁻¹ | 52.96±1.75c | 82.93±2.59a | 67.38±2.23b |
| S-CL U/g | 4.67±0.44c | 8.01±0.59a | 6.43±0.38b |
| S-UE U/g | 4.23±0.65c | 7.54±0.29a | 5.12±0.22b |
| S-ALP U/g | 0.74±0.05c | 1.80±0.03a | 1.13±0.11b |
| S-BG nmol·(g·h)⁻¹ | 136.21±10.64b | 289.14±14.22a | 265.05±20.09a |

**Table S2 Principal Component Analysis Results - Initial Eigenvalues and Extracted**

**Note:Values represent means ± standard deviation (n = 3). Different lowercase letters within a row indicate significant differences among treatments (*p <* 0.05). Treatments: CK (control), Fm (*Funneliformis mosseae*), Ri (*Rhizophagus intraradices*).**
